# Supplementary material for: Modeling structure and flexibility of Candida antarctica lipase B in organic solvents
Source: PubMed Central journal article supplement (PMC2262892; doi:10.1186/1472-6807-8-9), 2008-02-06
Supplement: 1472-6807-8-9-S1.pdf [file 1472-6807-8-9-S1.pdf]

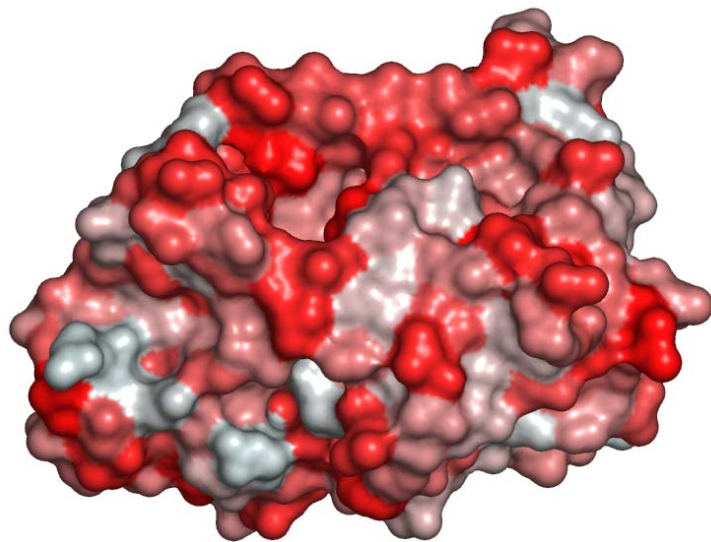

**Additional file 1**

Surface of CALB colored by hydrophobicity (hydrophobic, red; hydrophilic, white)
