# Supplementary material for: Modeling structure and flexibility of Candida antarctica lipase B in organic solvents
Source: PubMed Central journal article supplement (PMC2262892; doi:10.1186/1472-6807-8-9), 2008-02-06
Supplement: 1472-6807-8-9-S2.pdf [file 1472-6807-8-9-S2.pdf]

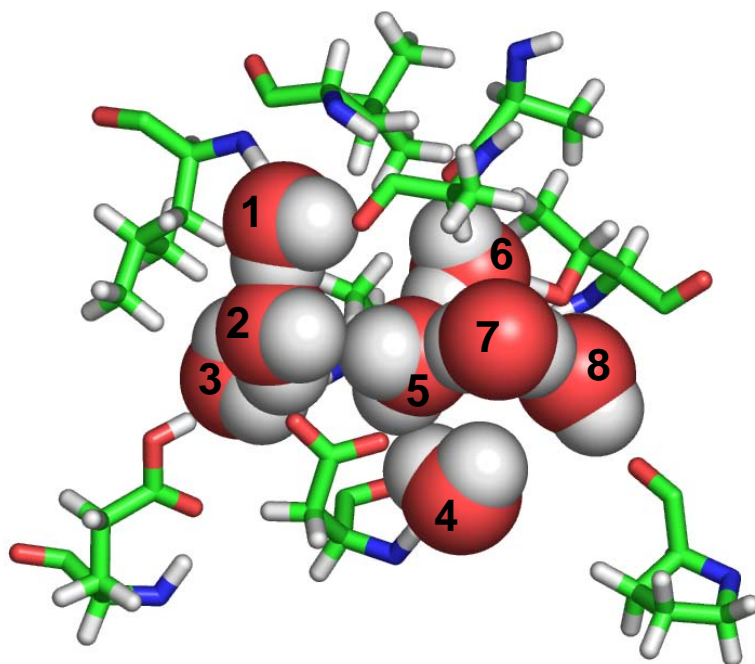

**Additional file 2**

Structure of cluster I in the simulation of CALB in cyclohexane, water molecules are displayed as red and white spheres
