# Supplementary material for: Modeling structure and flexibility of Candida antarctica lipase B in organic solvents
Source: PubMed Central journal article supplement (PMC2262892; doi:10.1186/1472-6807-8-9), 2008-02-06
Supplement: 1472-6807-8-9-S7.pdf [file 1472-6807-8-9-S7.pdf]

## Additional file 7

Equilibration of solvent boxes by molecular dynamics simulations

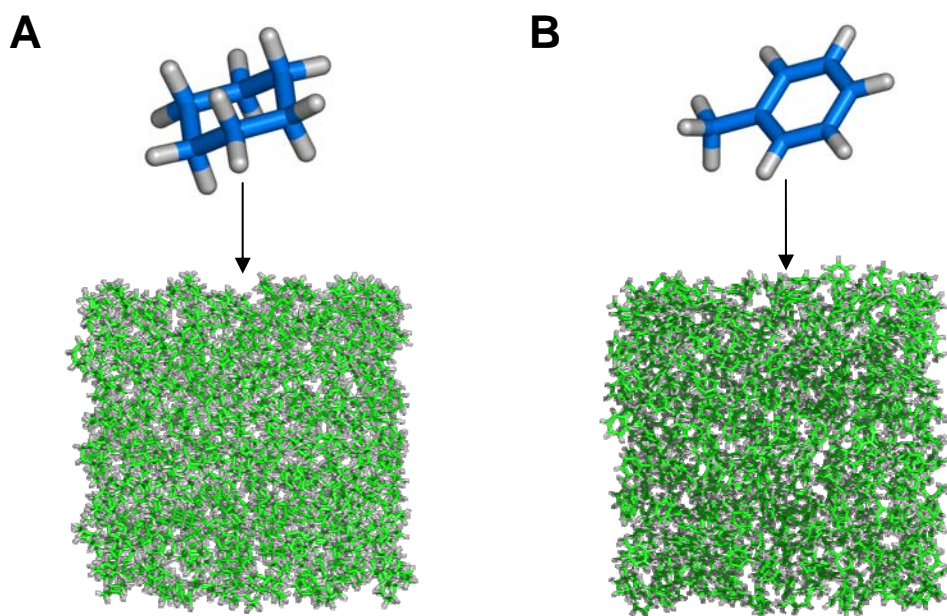

Figure Solvent molecules (blue) and equilibrated solvent boxes by molecular dynamics simulations (green) of cyclohexane (A) and toluene (B)

Table: Number of solvent molecules in simulated solvent boxes

| Solvent     | Number of solvent molecules in the box | Edge length of the box after simulation [ $\text{\AA}$ ] |
|-------------|----------------------------------------|----------------------------------------------------------|
| Cyclohexane | 379                                    | 41.1                                                     |
| Isopentane  | 351                                    | 40.7                                                     |
| Toluene     | 436                                    | 46.4                                                     |

Table: Comparison of the experimental density and the density of parametrized solvent models after simulation. Experimental densities were taken from the product properties at [www.sigmaaldrich.com](http://www.sigmaaldrich.com).

| Solvent     | Density after simulation [g/cm <sup>3</sup> ] | Experimental density [ g/cm <sup>3</sup> ] |
|-------------|-----------------------------------------------|--------------------------------------------|
| Cyclohexane | 0.76                                          | 0.78                                       |
| Isopentane  | 0.63                                          | 0.63                                       |
| Toluene     | 0.84                                          | 0.86                                       |
